# Supplementary material
Source: publisher site journal article supplement (https://www.spandidos-publications.com/2297/downloadSupplementary)

Figure S1. Representative expression level of Bcl-2, Bcl-xL and BimEL in the xenograft tumor tissues detected by immunohistochemistry. Bim, Bcl-2-like protein 11.

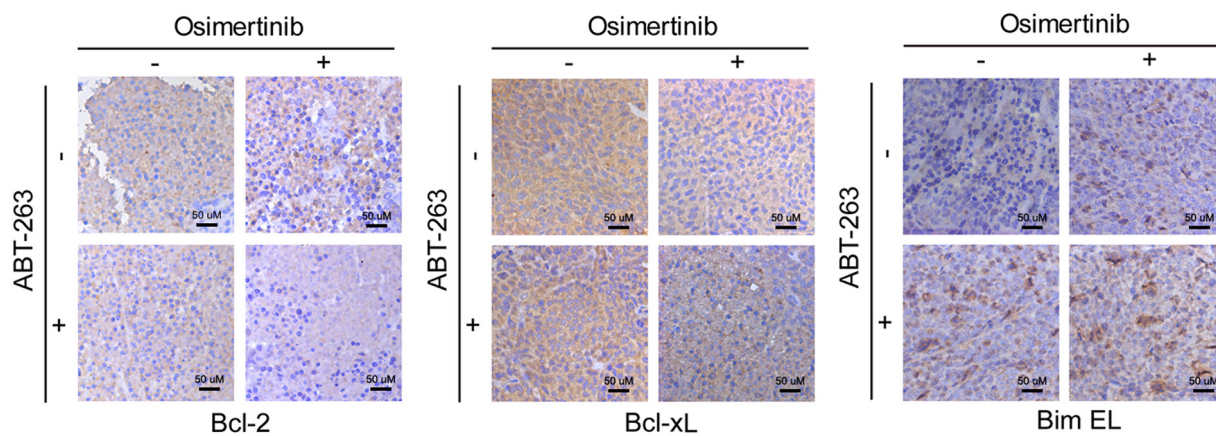

Supplement: Supplementary file 1 [file downloadSupplementary]
